# Supplementary material
Source: PubMed Central journal article supplement (PMC4696753)

# Supporting Information

## Accommodation of a 1*S* (–)-Benzo[*c*]phenanthrenyl-*N*<sup>6</sup>-dA Adduct in a Y Family Dpo4 DNA Polymerase Active Site: Structural Insights through Molecular Dynamics Simulations

Lihua Wang<sup>1</sup>, Min Wu<sup>2,4</sup>, S. Frank Yan<sup>2,5</sup>, Dinshaw J. Patel<sup>3</sup>, Nicholas E. Geacintov<sup>\*,2</sup>, Suse Broyde<sup>\*,1,2</sup>

<sup>1</sup>Department of Biology and <sup>2</sup>Department of Chemistry, New York University, New York, NY 10003

<sup>3</sup>Cellular Biochemistry & Biophysics Program, Memorial Sloan-Kettering Cancer Center, New York, NY 10021

<sup>4</sup>Current address: Pfizer Global Research and Development, La Jolla Laboratories, San Diego, CA 92121

<sup>5</sup>Current address: Genomics Institute of the Novartis Research Foundation, San Diego, CA 92121

\*Corresponding authors: (212) 998-8231, Fax (212) 995-4015, broyde@nyu.edu; (212) 998-8407, Fax (212) 998-8421, ngl@nyu.edu

**Running Title:** Benzo[*c*]phenanthrenyl-*N*<sup>6</sup>-dA adduct in Dpo4

**Key words:** environmental carcinogen; DNA adduct structure; Y family DNA polymerase; molecular dynamics simulation

## Tables

Table S1. Torsion angles in modeled Dpo4 ternary complexes from Type I and Type II crystal structures. <sup>a</sup>

| Model                           | Residue          | $\alpha$ (°) | $\beta$ (°) | $\gamma$ (°) | $\delta$ (°)  | $\epsilon$ (°) | $\zeta$ (°)   | $\chi$ (°)    |
|---------------------------------|------------------|--------------|-------------|--------------|---------------|----------------|---------------|---------------|
| Control and Major Groove Type I | tG <sub>1</sub>  | N/A          | N/A         | 36.4         | 156.4         | 155.0          | -94.6         | 116.0         |
|                                 | tG <sub>2</sub>  | 139.8        | -132.8      | <i>116.1</i> | <i>146.1</i>  | <i>-103.2</i>  | <i>127.8</i>  | <i>-139.1</i> |
| Intercalation                   | tG <sub>1</sub>  | N/A          | N/A         | 36.3         | 156.4         | 155.0          | -95.2         | -97.8         |
|                                 | tG <sub>2</sub>  | -46.8        | -146.0      | 36.4         | 156.4         | -62.3          | -129.9        | -97.8         |
|                                 | tA <sub>3</sub>  | -112.9       | -150.7      | -47.0        | 138.5         | -177.0         | -110.3        | -114.0        |
|                                 | tC <sub>4</sub>  | -87.2        | -94.3       | 36.3         | 156.4         | 107.0          | -80.0         | 148.9         |
|                                 | tA* <sub>5</sub> | -114.3       | 125.7       | 132.6        | 135.4         | -151.3         | -89.1         | -35.5         |
|                                 | tA <sub>6</sub>  | -79.2        | -175.4      | 52.6         | 146.1         | -161.0         | -112.1        | -99.3         |
|                                 | tG <sub>7</sub>  | -65.0        | 171.2       | <i>47.6</i>  | <i>119.8</i>  | <i>-179.1</i>  | <i>-120.7</i> | <i>-111.1</i> |
| -1 Deletion                     | tG <sub>1</sub>  | N/A          | N/A         | 36.4         | 156.4         | 154.9          | -95.2         | -97.8         |
|                                 | tG <sub>2</sub>  | -46.8        | -146.1      | 36.4         | 156.4         | -62.3          | -108.8        | -97.7         |
|                                 | tA <sub>3</sub>  | -135.2       | -172.2      | -5.2         | <i>-138.5</i> | <i>-143.3</i>  | <i>-150.4</i> | <i>-114.1</i> |

<sup>a</sup> N/A denotes values not applicable to the terminal residue. Italicized numbers denote crystal values.

Table S2. Hydrogen bonding interactions of > 10% occupancy or bifurcated hydrogen bonds between polymerase residues and the sugar–triphosphate backbone of the incoming dNTP.

| Model                                    | Hydrogen Bond <sup>a</sup>  | Occupancy <sup>b</sup>      |
|------------------------------------------|-----------------------------|-----------------------------|
| Control                                  | (Arg51)Nη1–Hη12...O2γ(dTTP) | 100%                        |
|                                          | (Arg51)Nη2–Hη22...O3β(dTTP) | 99.70%                      |
|                                          | (Arg51)Nη2–Hη22...O2γ(dTTP) | 90.90%                      |
|                                          | (Thr45)Oγ1–Hγ1...O1β(dTTP)  | 99.5%                       |
|                                          | (Tyr10)N–H...O2γ(dTTP)      | 95.60%                      |
|                                          | (Tyr10)N–H...O1γ(dTTP)      | 61.40%                      |
|                                          | (Tyr10)N–H...O3β(dTTP)      | 33.20%                      |
|                                          | (Phe11)N–H...O2β(dTTP)      | 95.30%                      |
|                                          | (Tyr12)N–H...O3'(dTTP)      | 81.75%                      |
|                                          | (Lys159)Nζ–Hζ1...O3γ(dTTP)  | 44.65%                      |
|                                          | (Lys159)Nζ–Hζ3...O3γ(dTTP)  | 32.50%                      |
|                                          | (Lys159)Nζ–Hζ2...O3γ(dTTP)  | 21.70%                      |
|                                          | (Lys159)Nζ–Hζ1...O2γ(dTTP)  | 6.60%                       |
|                                          | (Lys159)Nζ–Hζ3...O2γ(dTTP)  | 4.65%                       |
|                                          | (Lys159)Nζ–Hζ2...O2γ(dTTP)  | 4.10%                       |
|                                          | Intercalation               | (Arg51)Nη1–Hη12...O1γ(dTTP) |
| (Arg51)Nη2–Hη22...O3γ(dTTP)              |                             | 95.94%                      |
| (Arg51)Nη2–Hη22...O1γ(dTTP)              |                             | 40.62%                      |
| (Arg51)Nη1–Hη12...O3γ(dTTP)              |                             | 36.27%                      |
| (Arg51)Nη1–Hη12...O1β(dTTP)              |                             | 12.06%                      |
| (Thr45)Oγ1–Hγ1...O3γ(dTTP)               |                             | 36.51%                      |
| (Tyr10)N–H...O1γ(dTTP)                   |                             | 16.41%                      |
| (Tyr12)Oη–Hη...O3'(dTTP)                 |                             | 14.71%                      |
| (Tyr12)Oη–Hη...375O4'(dTTP)              |                             | 7.15%                       |
| (Lys159)Nζ–Hζ1...O1β(dTTP)               |                             | 42.47%                      |
| (Lys159)Nζ–Hζ1...O1γ(dTTP)               |                             | 18.51%                      |
| (Lys159)Nζ–Hζ2...O1β(dTTP)               |                             | 12.06%                      |
| (Lys159)Nζ–Hζ3...O1β(dTTP)               |                             | 12.01%                      |
| (Lys159)Nζ–Hζ2...O1γ(dTTP)               |                             | 10.86%                      |
| (Lys159)Nζ–Hζ3...O1γ(dTTP)               |                             | 9.65%                       |
| (Arg51)Nη2–Hη22...O1γ(dCTP)              |                             | 40.10%                      |
| (Thr45)Oγ1–Hγ1...O3γ(dCTP)               |                             | 99.9%                       |
| (Tyr10)N–H...O1γ(dCTP)                   |                             | 30.10%                      |
| (Tyr10)N–H...O2γ(dCTP)                   |                             | 19.75%                      |
| (Tyr10)N–H...O3β(dCTP)                   |                             | 33.20%                      |
| (Tyr12)Oη–Hη...375O2(dCTP)               | 99.95%                      |                             |
| (Lys159)Nζ–Hζ2...O1β(dCTP)               | 19.35%                      |                             |
| (Lys159)Nζ–Hζ3...O1β(dCTP)               | 12.80%                      |                             |
| (Lys159)Nζ–Hζ1...O1β(dCTP)               | 1.25%                       |                             |
| (Tyr12)Oη–Hη...O3'(dATP)                 | 98.60%                      |                             |
| (Arg51)Nη1–Hη12...O1γ( <i>syn</i> -dATP) | 99.50%                      |                             |
| (Arg51)Nη2–Hη22...O3γ( <i>syn</i> -dATP) | 92.35%                      |                             |
| (Arg51)Nη2–Hη22...O1γ( <i>syn</i> -dATP) | 78.35%                      |                             |
| (Thr45)Oγ1–Hγ1...O3γ( <i>syn</i> -dATP)  | 39.65%                      |                             |
| (Tyr10)N–H...O1γ( <i>syn</i> -dATP)      | 27.00%                      |                             |
| (Tyr10)N–H...O2γ( <i>syn</i> -dATP)      | 7.55%                       |                             |
| (Tyr10)N–H...O3β( <i>syn</i> -dATP)      | 33.20%                      |                             |
| (Tyr12)Oη–Hη...O3'( <i>syn</i> -dATP)    | 88.70%                      |                             |
| (Lys159)Nζ–Hζ3...O1β( <i>syn</i> -dATP)  | 65.90%                      |                             |
| (Lys159)Nζ–Hζ2...O1β( <i>syn</i> -dATP)  | 18.20%                      |                             |

|                                                                 |                                                                    |        |
|-----------------------------------------------------------------|--------------------------------------------------------------------|--------|
| Intercalation<br>(Cont'd)                                       | (Lys159)N $\zeta$ -H $\zeta$ 1...O1 $\beta$ ( <i>syn</i> -dATP)    | 15.25% |
|                                                                 | (Arg51)N $\eta$ 2-H $\eta$ 22...O3 $\gamma$ (dGTP)                 | 89.40% |
|                                                                 | (Arg51)N $\eta$ 1-H $\eta$ 12...O1 $\gamma$ (dGTP)                 | 72.90% |
|                                                                 | (Arg51)N $\eta$ 2-H $\eta$ 22...O1 $\gamma$ (dGTP)                 | 22.60% |
|                                                                 | (Arg51)N $\eta$ 1-H $\eta$ 12...O3 $\gamma$ (dGTP)                 | 16.15% |
|                                                                 | (Thr45)O $\gamma$ 1-H $\gamma$ 1...O3 $\gamma$ (dGTP)              | 16.05% |
|                                                                 | (Tyr12)O $\eta$ -H $\eta$ ...375O4'(dGTP)                          | 10.65% |
|                                                                 | (Lys159)N $\zeta$ -H $\zeta$ 2...O1 $\beta$ (dGTP)                 | 32.55% |
|                                                                 | (Lys159)N $\zeta$ -H $\zeta$ 1...O1 $\beta$ (dGTP)                 | 32.00% |
|                                                                 | (Lys159)N $\zeta$ -H $\zeta$ 3...O1 $\beta$ (dGTP)                 | 28.30% |
|                                                                 | (Lys159)N $\zeta$ -H $\zeta$ 2...O1 $\gamma$ (dGTP)                | 9.350% |
|                                                                 | (Lys159)N $\zeta$ -H $\zeta$ 1...O1 $\gamma$ (dGTP)                | 6.30%  |
|                                                                 | (Lys159)N $\zeta$ -H $\zeta$ 3...O1 $\gamma$ (dGTP)                | 4.70%  |
|                                                                 | (dGTP)O3'-HO3'...O $\delta$ 2(Asp105)                              | 64.15% |
|                                                                 | (Arg51)N $\eta$ 1-H $\eta$ 12...O1 $\gamma$ ( <i>syn</i> -dGTP)    | 99.40% |
|                                                                 | (Arg51)N $\eta$ 2-H $\eta$ 22...O3 $\gamma$ ( <i>syn</i> -dGTP)    | 99.00% |
|                                                                 | (Arg51)N $\eta$ 2-H $\eta$ 22...O1 $\gamma$ ( <i>syn</i> -dGTP)    | 70.00% |
|                                                                 | (Thr45)O $\gamma$ 1-H $\gamma$ 1...O3 $\gamma$ ( <i>syn</i> -dGTP) | 26.20% |
| (Tyr10)N-H...O1 $\gamma$ ( <i>syn</i> -dGTP)                    | 57.80%                                                             |        |
| (Tyr10)N-H...O2 $\gamma$ ( <i>syn</i> -dGTP)                    | 9.30%                                                              |        |
| (Phe11)N-H...O2 $\gamma$ ( <i>syn</i> -dGTP)                    | 67.55%                                                             |        |
| (Phe11)N-H...O3 $\gamma$ ( <i>syn</i> -dGTP)                    | 5.25%                                                              |        |
| (Tyr12)N-H...O3'(dGTP)                                          | 11.30%                                                             |        |
| (Lys159)N $\zeta$ -H $\zeta$ 1...O1 $\beta$ ( <i>syn</i> -dGTP) | 48.20%                                                             |        |
| (Lys159)N $\zeta$ -H $\zeta$ 2...O1 $\beta$ ( <i>syn</i> -dGTP) | 26.75%                                                             |        |
| (Lys159)N $\zeta$ -H $\zeta$ 3...O1 $\beta$ ( <i>syn</i> -dGTP) | 21.05%                                                             |        |
| Major<br>Groove<br>Type I                                       | (Arg51)N $\eta$ 1-H $\eta$ 12...O3 $\gamma$ (dTTP)                 | 99.80% |
|                                                                 | (Arg51)N $\eta$ 2-H $\eta$ 22...O3 $\beta$ (dTTP)                  | 83.80% |
|                                                                 | (Arg51)N $\eta$ 2-H $\eta$ 22...O3 $\gamma$ (dTTP)                 | 19.30% |
|                                                                 | (Arg51)N $\eta$ 1-H $\eta$ 12...O3 $\beta$ (dTTP)                  | 17.95% |
|                                                                 | (Arg51)N $\eta$ 2-H $\eta$ 22...O1 $\beta$ (dTTP)                  | 12.40% |
|                                                                 | (Tyr10)N-H...O2 $\gamma$ (dTTP)                                    | 100%   |
|                                                                 | (Phe11)N-H...O1 $\beta$ (dTTP)                                     | 27.45% |
|                                                                 | (Tyr12)N-H...O3'(dTTP)                                             | 91.75% |
|                                                                 | (Tyr12)O $\eta$ -H $\eta$ ...375O2(dTTP)                           | 7.90%  |
|                                                                 | (Tyr48)O $\eta$ -H $\eta$ ...O3 $\gamma$ (dTTP)                    | 93.35% |
|                                                                 | (Lys159)N $\zeta$ -H $\zeta$ 3...O1 $\gamma$ (dTTP)                | 51.20% |
|                                                                 | (Lys159)N $\zeta$ -H $\zeta$ 1...O1 $\gamma$ (dTTP)                | 44.40% |
|                                                                 | (Arg51)N $\eta$ 2-H $\eta$ 22...O3 $\beta$ (dCTP)                  | 87.25% |
|                                                                 | (Arg51)N $\eta$ 1-H $\eta$ 12...O2 $\gamma$ (dCTP)                 | 85.40% |
|                                                                 | (Arg51)N $\eta$ 2-H $\eta$ 22...O2 $\gamma$ (dCTP)                 | 34.80% |
|                                                                 | (Arg51)N $\eta$ 2-H $\eta$ 22...O1 $\beta$ (dCTP)                  | 22.10% |
|                                                                 | (Arg51)N $\eta$ 1-H $\eta$ 12...O3 $\beta$ (dCTP)                  | 15.35% |
|                                                                 | (Thr45)O $\gamma$ 1-H $\gamma$ 1...O1 $\beta$ (dCTP)               | 100%   |
|                                                                 | (Tyr10)N-H...O2 $\gamma$ (dCTP)                                    | 88.20% |
|                                                                 | (Tyr10)N-H...O3 $\beta$ (dCTP)                                     | 57.20% |
|                                                                 | (Tyr10)N-H...O1 $\gamma$ (dCTP)                                    | 37.65% |
|                                                                 | (Phe11)N-H...O2 $\beta$ (dCTP)                                     | 22.25% |
|                                                                 | (Tyr12)O $\eta$ -H $\eta$ ...375O2(dCTP)                           | 88.85% |
|                                                                 | (Tyr12)N-H...O3'(dCTP)                                             | 83.45% |
| (Tyr48)O $\eta$ -H $\eta$ ...O2 $\gamma$ (dCTP)                 | 37.75%                                                             |        |
| (Lys159)N $\zeta$ -H $\zeta$ 1...O3 $\gamma$ (dCTP)             | 45.95%                                                             |        |
| (Lys159)N $\zeta$ -H $\zeta$ 3...O3 $\gamma$ (dCTP)             | 36.95%                                                             |        |
| (Lys159)N $\zeta$ -H $\zeta$ 2...O3 $\gamma$ (dCTP)             | 14.55%                                                             |        |

|                                       |                                                                   |                                                    |        |
|---------------------------------------|-------------------------------------------------------------------|----------------------------------------------------|--------|
|                                       | (Lys159)N $\zeta$ -H $\zeta$ 1...O2 $\gamma$ (dCTP)               | 13.75%                                             |        |
|                                       | (Lys159)N $\zeta$ -H $\zeta$ 3...O2 $\gamma$ (dCTP)               | 9.10%                                              |        |
|                                       | (Lys159)N $\zeta$ -H $\zeta$ 2...O2 $\gamma$ (dCTP)               | 4.50%                                              |        |
|                                       | (Arg51)N $\eta$ 2-H $\eta$ 22...O3 $\beta$ (dATP)                 | 72.95%                                             |        |
|                                       | (Arg51)N $\eta$ 1-H $\eta$ 12...O2 $\gamma$ (dATP)                | 70.05%                                             |        |
|                                       | (Arg51)N $\eta$ 1-H $\eta$ 12...O3 $\beta$ (dATP)                 | 56.35%                                             |        |
|                                       | (Arg51)N $\eta$ 2-H $\eta$ 22...O1 $\beta$ (dATP)                 | 53.30%                                             |        |
|                                       | (Arg51)N $\eta$ 2-H $\eta$ 22...O2 $\gamma$ (dATP)                | 15.50%                                             |        |
|                                       | (Arg51)N $\eta$ 1-H $\eta$ 12...O3 $\gamma$ (dATP)                | 13.45%                                             |        |
|                                       | (Thr45)O $\gamma$ 1-H $\gamma$ 1...O3'(dATP)                      | 86.30%                                             |        |
|                                       | (Thr45)O $\gamma$ 1-H $\gamma$ 1...O1 $\beta$ (dATP)              | 7.25%                                              |        |
|                                       | (Tyr10)N-H...O2 $\gamma$ (dATP)                                   | 98.65%                                             |        |
|                                       | (Tyr10)N-H...O3 $\beta$ (dATP)                                    | 38.65%                                             |        |
|                                       | (Tyr10)N-H...O1 $\gamma$ (dATP)                                   | 27.50%                                             |        |
|                                       | (Tyr48)O $\eta$ -H $\eta$ ...O2 $\gamma$ (dATP)                   | 97.50%                                             |        |
|                                       | (Tyr48)O $\eta$ -H $\eta$ ...O3 $\gamma$ (dATP)                   | 8.10%                                              |        |
|                                       | (Lys159)N $\zeta$ -H $\zeta$ 2...O3 $\gamma$ (dATP)               | 46.60%                                             |        |
|                                       | (Lys159)N $\zeta$ -H $\zeta$ 1...O3 $\gamma$ (dATP)               | 27.55%                                             |        |
|                                       | (Lys159)N $\zeta$ -H $\zeta$ 3...O3 $\gamma$ (dATP)               | 19.90%                                             |        |
|                                       | (Lys159)N $\zeta$ -H $\zeta$ 1...O1 $\gamma$ (dATP)               | 7.30%                                              |        |
|                                       | (Lys159)N $\zeta$ -H $\zeta$ 2...O1 $\gamma$ (dATP)               | 6.90%                                              |        |
|                                       | (Lys159)N $\zeta$ -H $\zeta$ 3...O1 $\gamma$ (dATP)               | 1.40%                                              |        |
| Major<br>Groove<br>Type I<br>(Cont'd) | (Arg51)N $\eta$ 2-H $\eta$ 22...O3 $\beta$ ( <i>syn</i> -dATP)    | 99.90%                                             |        |
|                                       | (Arg51)N $\eta$ 1-H $\eta$ 12...O2 $\gamma$ ( <i>syn</i> -dATP)   | 99.50%                                             |        |
|                                       | (Arg51)N $\eta$ 2-H $\eta$ 22...O2 $\gamma$ ( <i>syn</i> -dATP)   | 48.05%                                             |        |
|                                       | (Arg51)N $\eta$ 1-H $\eta$ 12...O3 $\gamma$ ( <i>syn</i> -dATP)   | 21.00%                                             |        |
|                                       | (Arg51)N $\eta$ 2-H $\eta$ 22...O1 $\beta$ ( <i>syn</i> -dATP)    | 11.65%                                             |        |
|                                       | (Arg51)N $\eta$ 1-H $\eta$ 12...O3 $\beta$ ( <i>syn</i> -dATP)    | 8.30%                                              |        |
|                                       | (Arg51)N $\eta$ 2-H $\eta$ 22...O3 $\gamma$ ( <i>syn</i> -dATP)   | 6.80%                                              |        |
|                                       | (Thr45)O $\gamma$ 1-H $\gamma$ 1...O1 $\beta$ ( <i>syn</i> -dATP) | 98.25%                                             |        |
|                                       | (Thr45)O $\gamma$ 1-H $\gamma$ 1...O3'( <i>syn</i> -dATP)         | 13.35%                                             |        |
|                                       | (Tyr10)N-H...O2 $\gamma$ ( <i>syn</i> -dATP)                      | 100%                                               |        |
|                                       | (Tyr10)N-H...O3 $\beta$ ( <i>syn</i> -dATP)                       | 34.70%                                             |        |
|                                       | (Tyr12)N-H...O3'( <i>syn</i> -dATP)                               | 19.45%                                             |        |
|                                       | (Lys159)N $\zeta$ -H $\zeta$ 1...O1 $\gamma$ ( <i>syn</i> -dATP)  | 34.95%                                             |        |
|                                       | (Lys159)N $\zeta$ -H $\zeta$ 1...O3 $\gamma$ ( <i>syn</i> -dATP)  | 26.95%                                             |        |
|                                       | (Lys159)N $\zeta$ -H $\zeta$ 3...O1 $\gamma$ ( <i>syn</i> -dATP)  | 20.55%                                             |        |
|                                       | (Lys159)N $\zeta$ -H $\zeta$ 3...O3 $\gamma$ ( <i>syn</i> -dATP)  | 16.50%                                             |        |
|                                       | (Lys159)N $\zeta$ -H $\zeta$ 2...O1 $\gamma$ ( <i>syn</i> -dATP)  | 15.00%                                             |        |
|                                       | (Lys159)N $\zeta$ -H $\zeta$ 2...O3 $\gamma$ ( <i>syn</i> -dATP)  | 14.00%                                             |        |
|                                       |                                                                   | (Arg51)N $\eta$ 2-H $\eta$ 22...O3 $\beta$ (dGTP)  | 100%   |
|                                       |                                                                   | (Arg51)N $\eta$ 1-H $\eta$ 12...O2 $\gamma$ (dGTP) | 97.60% |
|                                       | (Arg51)N $\eta$ 2-H $\eta$ 22...O2 $\gamma$ (dGTP)                | 32.70%                                             |        |
|                                       | (Arg51)N $\eta$ 1-H $\eta$ 12...O3 $\beta$ (dGTP)                 | 27.95%                                             |        |
|                                       | (Arg51)N $\eta$ 2-H $\eta$ 22...O1 $\beta$ (dGTP)                 | 25.90%                                             |        |
|                                       | (Arg51)N $\eta$ 1-H $\eta$ 12...O3 $\gamma$ (dGTP)                | 18.40%                                             |        |
|                                       | (Thr45)O $\gamma$ 1-H $\gamma$ 1...O1 $\beta$ (dGTP)              | 99.95%                                             |        |
|                                       | (Tyr10)N-H...O2 $\gamma$ (dGTP)                                   | 79.10%                                             |        |
|                                       | (Tyr10)N-H...O3 $\beta$ (dGTP)                                    | 42.25%                                             |        |
|                                       | (Phe11)N-H...O2 $\beta$ (dGTP)                                    | 98.95%                                             |        |
|                                       | (Tyr12)N-H...O3'(dGTP)                                            | 81.25%                                             |        |
|                                       | (Tyr48)O $\eta$ -H $\eta$ ...O2 $\gamma$ (dGTP)                   | 33.00%                                             |        |
|                                       | (Lys159)N $\zeta$ -H $\zeta$ 3...O3 $\gamma$ (dGTP)               | 43.20%                                             |        |
|                                       | (Lys159)N $\zeta$ -H $\zeta$ 2...O3 $\gamma$ (dGTP)               | 40.15%                                             |        |

|                                                                  |                                                                   |        |
|------------------------------------------------------------------|-------------------------------------------------------------------|--------|
|                                                                  | (Lys159)N $\zeta$ -H $\zeta$ 1...O3 $\gamma$ (dGTP)               | 15.05% |
|                                                                  | (Lys159)N $\zeta$ -H $\zeta$ 2...O2 $\gamma$ (dGTP)               | 14.45% |
|                                                                  | (Lys159)N $\zeta$ -H $\zeta$ 3...O2 $\gamma$ (dGTP)               | 11.60% |
|                                                                  | (Lys159)N $\zeta$ -H $\zeta$ 1...O2 $\gamma$ (dGTP)               | 4.60%  |
| Major<br>Groove<br>Type I<br>(Cont'd)                            | (Arg51)N $\eta$ 2-H $\eta$ 22...O3 $\beta$ ( <i>syn</i> -dGTP)    | 99.95% |
|                                                                  | (Arg51)N $\eta$ 1-H $\eta$ 12...O3 $\gamma$ ( <i>syn</i> -dGTP)   | 99.10% |
|                                                                  | (Arg51)N $\eta$ 1-H $\eta$ 12...O2 $\gamma$ ( <i>syn</i> -dGTP)   | 33.65% |
|                                                                  | (Arg51)N $\eta$ 2-H $\eta$ 22...O3 $\gamma$ ( <i>syn</i> -dGTP)   | 19.65% |
|                                                                  | (Arg51)N $\eta$ 1-H $\eta$ 12...O3 $\beta$ ( <i>syn</i> -dGTP)    | 12.15% |
|                                                                  | (Arg51)N $\eta$ 2-H $\eta$ 22...O1 $\beta$ ( <i>syn</i> -dGTP)    | 11.55% |
|                                                                  | (Thr45)O $\gamma$ 1-H $\gamma$ 1...O1 $\beta$ ( <i>syn</i> -dGTP) | 100%   |
|                                                                  | (Tyr10)N-H...O2 $\gamma$ ( <i>syn</i> -dGTP)                      | 99.95% |
|                                                                  | (Tyr10)N-H...O3 $\beta$ ( <i>syn</i> -dGTP)                       | 43.90% |
|                                                                  | (Phe11)N-H...O2 $\beta$ ( <i>syn</i> -dGTP)                       | 85.00% |
|                                                                  | (Phe11)N-H...O1 $\beta$ ( <i>syn</i> -dGTP)                       | 6.40%  |
|                                                                  | (Tyr12)N-H...O3'( <i>syn</i> -dGTP)                               | 51.10% |
|                                                                  | (Tyr48)O $\eta$ -H $\eta$ ...O2 $\gamma$ ( <i>syn</i> -dGTP)      | 100%   |
|                                                                  | (Lys159)N $\zeta$ -H $\zeta$ 1...O3 $\gamma$ ( <i>syn</i> -dGTP)  | 41.90% |
|                                                                  | (Lys159)N $\zeta$ -H $\zeta$ 3...O3 $\gamma$ ( <i>syn</i> -dGTP)  | 40.70% |
|                                                                  | (Lys159)N $\zeta$ -H $\zeta$ 2...O3 $\gamma$ ( <i>syn</i> -dGTP)  | 16.80% |
| (Lys159)N $\zeta$ -H $\zeta$ 3...O2 $\gamma$ ( <i>syn</i> -dGTP) | 3.90%                                                             |        |
| (Lys159)N $\zeta$ -H $\zeta$ 1...O2 $\gamma$ ( <i>syn</i> -dGTP) | 3.80%                                                             |        |
| (Lys159)N $\zeta$ -H $\zeta$ 2...O2 $\gamma$ ( <i>syn</i> -dGTP) | 1.15%                                                             |        |
| -1 Deletion                                                      | (Tyr10)N-H...O1 $\gamma$ (dGTP)                                   | 47.45% |
|                                                                  | (Tyr10)N-H...O2 $\gamma$ (dGTP)                                   | 19.40% |
|                                                                  | (Phe11)N-H...O3 $\gamma$ (dGTP)                                   | 12.50% |
|                                                                  | (Phe11)N-H...O2 $\gamma$ (dGTP)                                   | 9.80%  |

<sup>a</sup> Hydrogen bonds are specified in the format (A)B-C...D(E), where A is the residue name of the donor atom, B is the name of the donor atom, C is the name of the hydrogen atom, D is the name of the acceptor atom, and E is the residue name of the acceptor atom. \* denotes 1S (-)-B[c]Ph-dA modification.

<sup>b</sup> Criterion for hydrogen bond occupancy is: heavy-to-heavy distance  $\leq 3.4$  Å and bond angle  $\leq 135^\circ$ .

Table S3. Hydrogen bonding interactions of >10% occupancy between the adducted adenine and neighboring bases or protein residues other than the incoming dNTP.

| Model                                               | dNTP     | Hydrogen Bond <sup>a</sup>                          | Distance (Å) <sup>b</sup> | Angle (°) <sup>b</sup> | Occupancy <sup>c</sup> |
|-----------------------------------------------------|----------|-----------------------------------------------------|---------------------------|------------------------|------------------------|
| Intercalation                                       | dTTP     | (tA <sub>3</sub> )N6–H61...O4Z(tA* <sub>5</sub> )   | 3.08 ± 0.16               | 160.5 ± 10.3           | 71.59%                 |
|                                                     |          | (tA* <sub>5</sub> )O2Z–HO2Z...O4(pT <sub>13</sub> ) | 2.86 ± 0.18               | 158.0 ± 8.4            | 63.48%                 |
|                                                     |          | (tC <sub>4</sub> )N4–H42...O3Z(tA* <sub>5</sub> )   | 3.06 ± 0.17               | 150.2 ± 10.1           | 35.22%                 |
|                                                     |          | (tA <sub>3</sub> )N6–H61...O3Z(tA* <sub>5</sub> )   | 3.07 ± 0.18               | 150.0 ± 10.6           | 16.66%                 |
|                                                     | dCTP     | (tA* <sub>5</sub> )O4Z–HO4Z...O(Gly58)              | 2.81 ± 0.17               | 166.6 ± 9.1            | 56.10%                 |
|                                                     |          | (tA* <sub>5</sub> )O2Z–HO2Z...O4(pT <sub>13</sub> ) | 2.91 ± 0.19               | 154.9 ± 8.5            | 52.20%                 |
|                                                     |          | (tA* <sub>5</sub> )O3Z–HO3Z...N3(tC <sub>4</sub> )  | 2.94 ± 0.18               | 165.1 ± 8.3            | 49.35%                 |
|                                                     |          | (tA <sub>3</sub> )N6–H61...O3Z(tA* <sub>5</sub> )   | 3.06 ± 0.17               | 155.8 ± 12.7           | 42.50%                 |
|                                                     |          | (tA <sub>6</sub> )N6–H61...O2Z(tA* <sub>5</sub> )   | 3.00 ± 0.16               | 151.1 ± 9.9            | 33.75%                 |
|                                                     |          | (tA* <sub>5</sub> )N6–H6...O(Gly58)                 | 3.18 ± 0.15               | 164.7 ± 7.8            | 29.65%                 |
|                                                     |          | (tA <sub>3</sub> )N6–H61...O4Z(tA* <sub>5</sub> )   | 3.12 ± 0.16               | 158.2 ± 10.0           | 27.45%                 |
|                                                     |          | (tA* <sub>5</sub> )O4Z–HO4Z...N1(tA <sub>3</sub> )  | 2.95 ± 0.17               | 161.5 ± 11.3           | 25.70%                 |
|                                                     | dATP     | (tA* <sub>5</sub> )O3Z–HO3Z...N1(tA <sub>3</sub> )  | 2.90 ± 0.16               | 162.8 ± 10.8           | 20.75%                 |
|                                                     |          | (tC <sub>4</sub> )N4–H41...O3Z(tA* <sub>5</sub> )   | 3.16 ± 0.18               | 155.3 ± 10.9           | 12.85%                 |
|                                                     |          | (tA* <sub>5</sub> )O2Z–HO2Z...O4(pT <sub>13</sub> ) | 2.82 ± 0.16               | 153.6 ± 8.2            | 78.35%                 |
|                                                     |          | (tA <sub>3</sub> )N6–H61...O4Z(tA* <sub>5</sub> )   | 3.03 ± 0.16               | 162.9 ± 10.2           | 73.75%                 |
|                                                     |          | (tA <sub>6</sub> )N6–H61...O2Z(tA* <sub>5</sub> )   | 2.96 ± 0.14               | 150.5 ± 9.7            | 61.65%                 |
|                                                     |          | (tA* <sub>5</sub> )O4Z–HO4Z...N1(tA <sub>3</sub> )  | 2.86 ± 0.14               | 165.8 ± 8.6            | 24.25%                 |
|                                                     |          | (tA <sub>3</sub> )N6–H61...O3Z(tA* <sub>5</sub> )   | 3.11 ± 0.16               | 152.4 ± 11.4           | 14.60%                 |
|                                                     |          | (tA* <sub>5</sub> )O2Z–HO2Z...N1(tA <sub>6</sub> )  | 2.91 ± 0.21               | 165.9 ± 9.7            | 12.75%                 |
|                                                     | syn-dATP | (tC <sub>4</sub> )N4–H42...O3Z(tA* <sub>5</sub> )   | 3.03 ± 0.17               | 144.8 ± 7.6            | 7.60%                  |
|                                                     |          | (tC <sub>4</sub> )N4–H41...O3Z(tA* <sub>5</sub> )   | 2.99 ± 0.16               | 154.2 ± 11.8           | 5.85%                  |
|                                                     |          | (tA* <sub>5</sub> )O2Z–HO2Z...O4(pT <sub>13</sub> ) | 2.81 ± 0.15               | 158.4 ± 8.1            | 95.75%                 |
|                                                     |          | (tA <sub>3</sub> )N6–H61...O4Z(tA* <sub>5</sub> )   | 3.02 ± 0.16               | 158.1 ± 10.7           | 74.95%                 |
|                                                     | dGTP     | (tA <sub>6</sub> )N6–H61...O2Z(tA* <sub>5</sub> )   | 2.92 ± 0.14               | 159.3 ± 9.9            | 66.75%                 |
|                                                     |          | (tC <sub>4</sub> )N4–H42...O3Z(tA* <sub>5</sub> )   | 3.02 ± 0.16               | 149.2 ± 9.4            | 29.25%                 |
|                                                     |          | (tA* <sub>5</sub> )O2Z–HO2Z...O4(pT <sub>13</sub> ) | 2.81 ± 0.17               | 158.5 ± 8.1            | 76.00%                 |
|                                                     | syn-dGTP | (tA <sub>6</sub> )N6–H61...O2Z(tA* <sub>5</sub> )   | 2.95 ± 0.15               | 155.1 ± 10.3           | 57.20%                 |
| (tC <sub>4</sub> )N4–H41...O3Z(tA* <sub>5</sub> )   |          | 2.99 ± 0.16                                         | 156.7 ± 10.9              | 18.45%                 |                        |
| (tA* <sub>5</sub> )O2Z–HO2Z...O4(pT <sub>13</sub> ) |          | 2.93 ± 0.20                                         | 157.8 ± 9.6               | 55.25%                 |                        |
| (tC <sub>4</sub> )N4–H42...O3Z(tA* <sub>5</sub> )   |          | 3.01 ± 0.17                                         | 154.4 ± 10.6              | 34.60%                 |                        |
| (tC <sub>4</sub> )N4–H41...O3Z(tA* <sub>5</sub> )   |          | 3.00 ± 0.16                                         | 159.1 ± 11.8              | 20.60%                 |                        |
| Major Groove Type I                                 | dTTP     | (tA <sub>6</sub> )N6–H62...N7(tA* <sub>5</sub> )    | 3.18 ± 0.13               | 155.1 ± 10.3           | 17.40%                 |
|                                                     |          | (tA <sub>3</sub> )N6–H61...O4Z(tA* <sub>5</sub> )   | 3.11 ± 0.17               | 162.8 ± 10.3           | 14.00%                 |
|                                                     | dCTP     | (tA* <sub>5</sub> )O3Z–HO3Z...O(Val43)              | 2.66 ± 0.10               | 169.4 ± 6.2            | 99.85%                 |
|                                                     |          | (Gly58)N–H...O3Z(tA* <sub>5</sub> )                 | 2.90 ± 0.12               | 164.8 ± 8.8            | 96.00%                 |
|                                                     | dATP     | (tA* <sub>5</sub> )O3Z–HO3Z...O(Val43)              | 2.66 ± 0.10               | 169.4 ± 6.0            | 92.55%                 |
|                                                     |          | (Gly58)N–H...O3Z(tA* <sub>5</sub> )                 | 2.95 ± 0.15               | 157.9 ± 10.4           | 85.70%                 |
|                                                     | syn-dATP | (tA* <sub>5</sub> )O3Z–HO3Z...O(Ala57)              | 2.77 ± 0.16               | 167.7 ± 7.9            | 67.30%                 |
|                                                     |          | (tA* <sub>5</sub> )O3Z–HO3Z...O(Val43)              | 2.84 ± 0.19               | 165.5 ± 10.2           | 31.45%                 |
|                                                     | dGTP     | (tA* <sub>5</sub> )O3Z–HO3Z...O(Val43)              | 2.67 ± 0.10               | 169.6 ± 5.9            | 100%                   |
|                                                     |          | (Gly58)N–H...O3Z(tA* <sub>5</sub> )                 | 2.92 ± 0.12               | 164.6 ± 8.1            | 98.95%                 |
|                                                     | syn-dGTP | (tA* <sub>5</sub> )O3Z–HO3Z...O(Val43)              | 2.69 ± 0.11               | 168.8 ± 6.9            | 99.40%                 |
|                                                     |          | (Gly58)N–H...O3Z(tA* <sub>5</sub> )                 | 2.90 ± 0.12               | 163.3 ± 8.3            | 97.70%                 |
| (tA* <sub>5</sub> )O2Z–HO2Z...O(Gly58)              |          | 3.02 ± 0.20                                         | 152.0 ± 9.5               | 12.15%                 |                        |
| (tA* <sub>5</sub> )O3Z–HO3Z...O(Val43)              |          | 2.68 ± 0.11                                         | 169.5 ± 6.3               | 99.85%                 |                        |
| –1 Deletion                                         | dGTP     | (Gly58)N–H...O3Z(tA* <sub>5</sub> )                 | 2.93 ± 0.13               | 161.3 ± 10.4           | 84.00%                 |
|                                                     |          | (tC <sub>4</sub> )N4–H42...O3Z(tA* <sub>5</sub> )   | 3.00 ± 0.15               | 163.8 ± 7.9            | 79.35%                 |
|                                                     |          | (tA* <sub>5</sub> )O2Z–HO2Z...N7(tA <sub>3</sub> )  | 3.12 ± 0.16               | 151.6 ± 8.3            | 31.70%                 |

<sup>a-c</sup> See footnotes of Table 1.

## Figure Legends

Figure S1. RMSDs for the Dpo4 ternary complexes over the 1 ns MD simulations. **(A)** RMSDs for the unmodified control with incoming dTTP and 1S (-)-B[c]Ph-dA intercalation models with varying incoming dNTPs. Color code: control, black; dTTP, green; dCTP, orange; dATP, red; *syn*-dATP, cyan; dGTP, blue; *syn*-dGTP, magenta. **(B)** RMSDs for the major groove Type I models with varying dNTPs and -1 deletion model with incoming dGTP. Color code: same as in **(A)** except that *black* represents the -1 deletion case.

Figure S2. Time dependence of the linkage site torsional angles  $\alpha'$ ,  $\beta'$  and  $\chi$  over 1 ns time frame for unmodified control and 1S (-)-B[c]Ph-dA intercalation structures in the Dpo4 DNA polymerase. See Figure 1 for definition of the torsion angles. Color code: same as in Figure S1A.

Figure S3. Time dependence of the linkage site torsional angles  $\alpha'$ ,  $\beta'$  and  $\chi$  over 1 ns time frame for 1S (-)-B[c]Ph-dA major groove Type I structures and -1 deletion model in the Dpo4 DNA polymerase. See Figure 1 for definition of the torsion angles. Color code: same as in Figure S1B.

Figure S4. Time dependence of distances and angles of significantly occupied hydrogen bonds (> 50% occupancy) between the templating residue and incoming dNTP in unmodified control and 1S (-)-B[c]Ph-dA intercalation structures in the Dpo4 DNA polymerase. Refer to Table 1 for complete specifications of these hydrogen bonds. Color code: the same as in Figure S1A.

Figure S5. Stacking interactions in the unmodified control and in the 1S (-)-B[c]Ph-dA intercalation structures of the Dpo4 ternary complexes after 1 ns of MD. **(A)–(G)** are the same as in Figure 2. Color code: unmodified or modified adenine, green; incoming dNTP, purple; B[c]Ph, red; tA<sub>6</sub>, magenta; pT<sub>13</sub>, cyan. The view is along the DNA helix axis from 5' to 3' end of the template strand. All stereo images are constructed for viewing with a stereoviewer.

Figure S6. Time dependence of the distances between C1's of the nascent base pair and distances between P $\alpha$  of dNTP and O3' of the primer terminus, in the unmodified control and 1S (-)-B[c]Ph-dA intercalation structures in the Dpo4 DNA polymerase. Color code: the same as in Figure S1A.

Figure S7. Time dependence of the distances between C1's of the nascent base pair and distances between P $\alpha$  of dNTP and O3' of the primer terminus, in the 1S (-)-B[c]Ph-dA major groove and -1 deletion models of the Dpo4 ternary complexes. Color code: the same as in Figure S1B.

Figure S8. Time dependence of distances and angles of significantly occupied hydrogen bonds (> 50% occupancy) between the templating residue and incoming dNTP in the 1S (-)-B[c]Ph-dA major groove and -1 deletion models of the Dpo4 ternary complexes. Refer to Table 1 for complete specifications of these hydrogen bonds. Color code: the same as in Figure S1B.

Figure S9. Stacking interactions in the unmodified control and in the 1S (-)-B[c]Ph-dA major groove and -1 deletion models of the Dpo4 ternary complexes after 1 ns of MD. **(A)–(G)** are the same as in Figure 5. Color code: the same as in Figure S5 except that tC<sub>4</sub> is shown in orange in **(G)**. All stereo images are constructed for viewing with a stereoviewer.



**Figure S1**

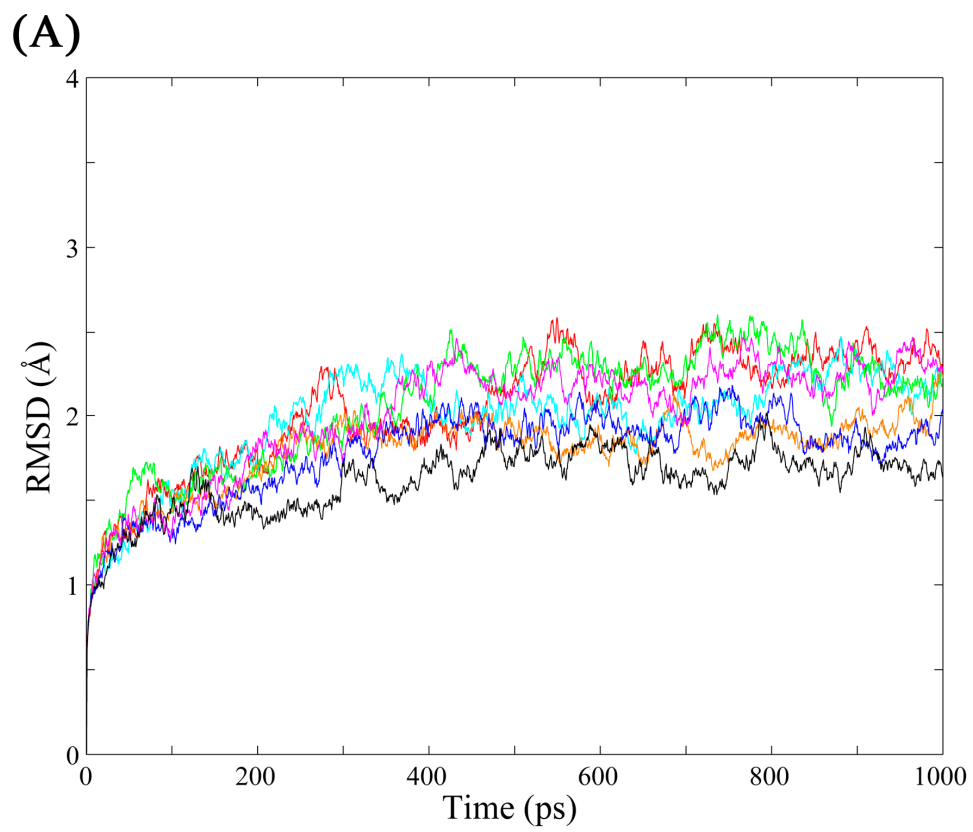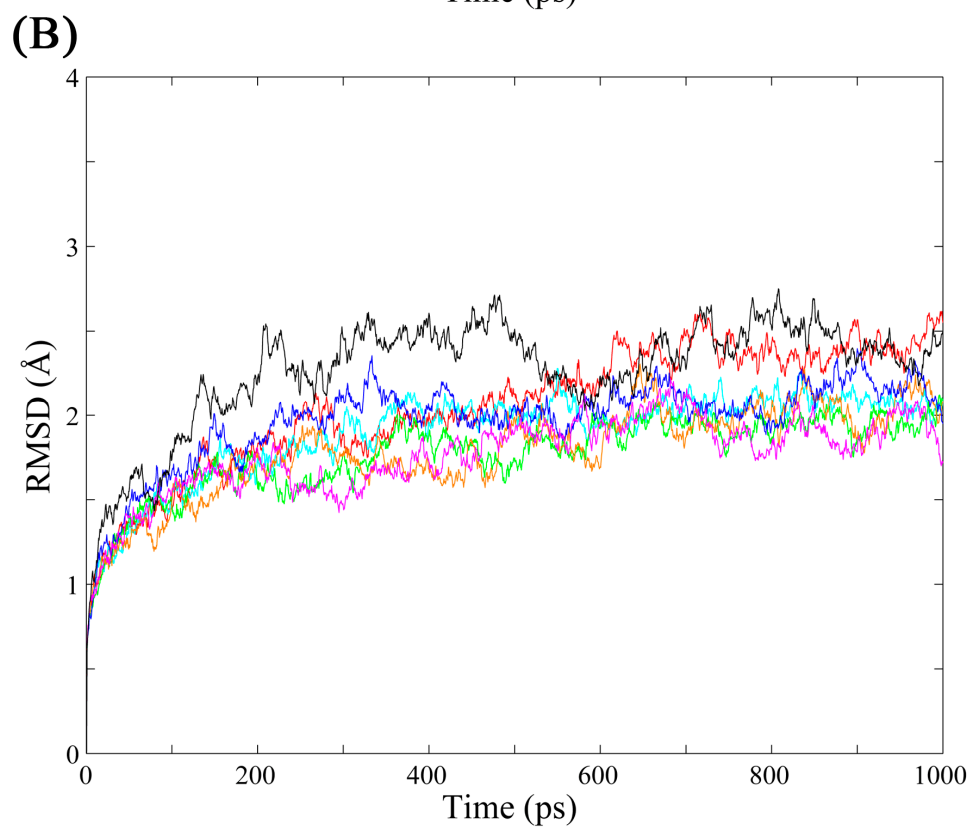

Figure S2

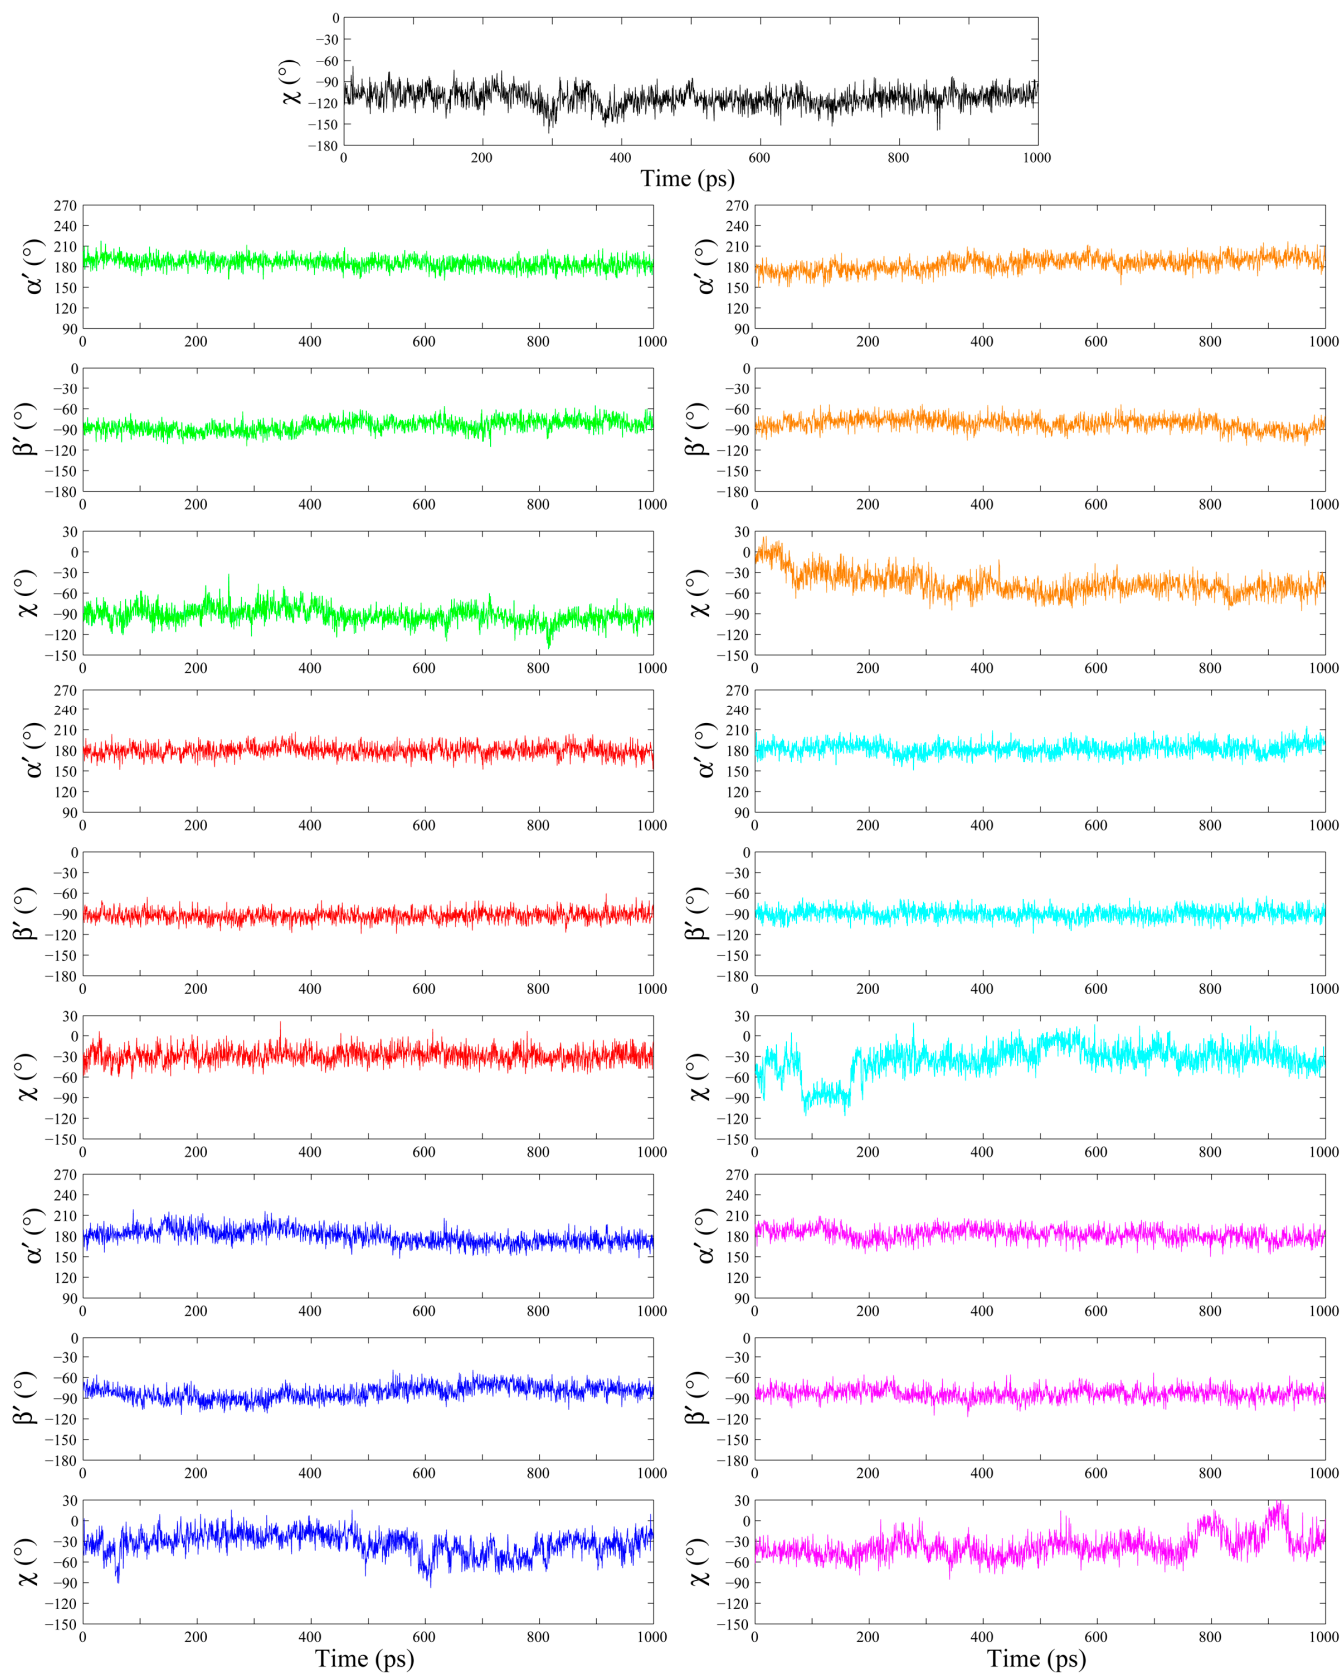

Figure S3

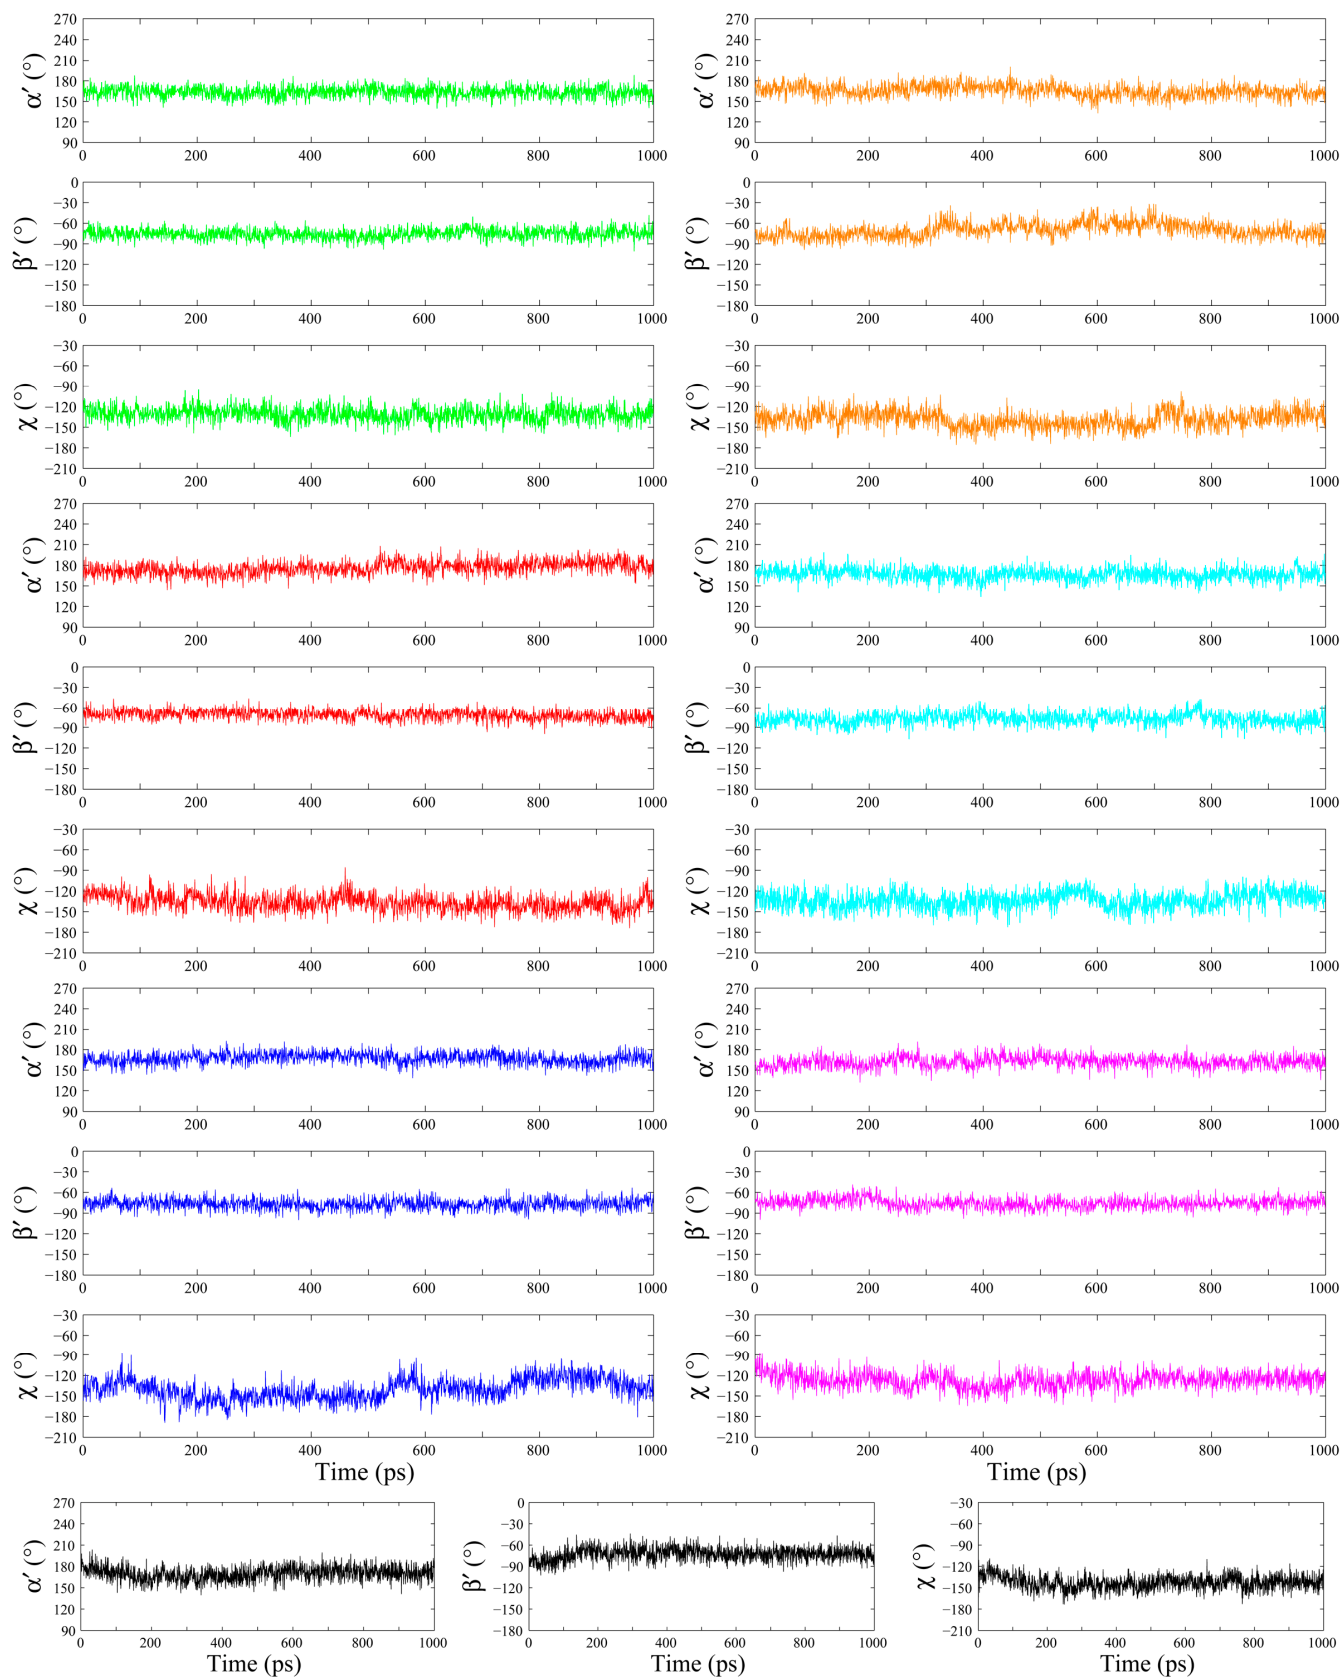

Figure S4

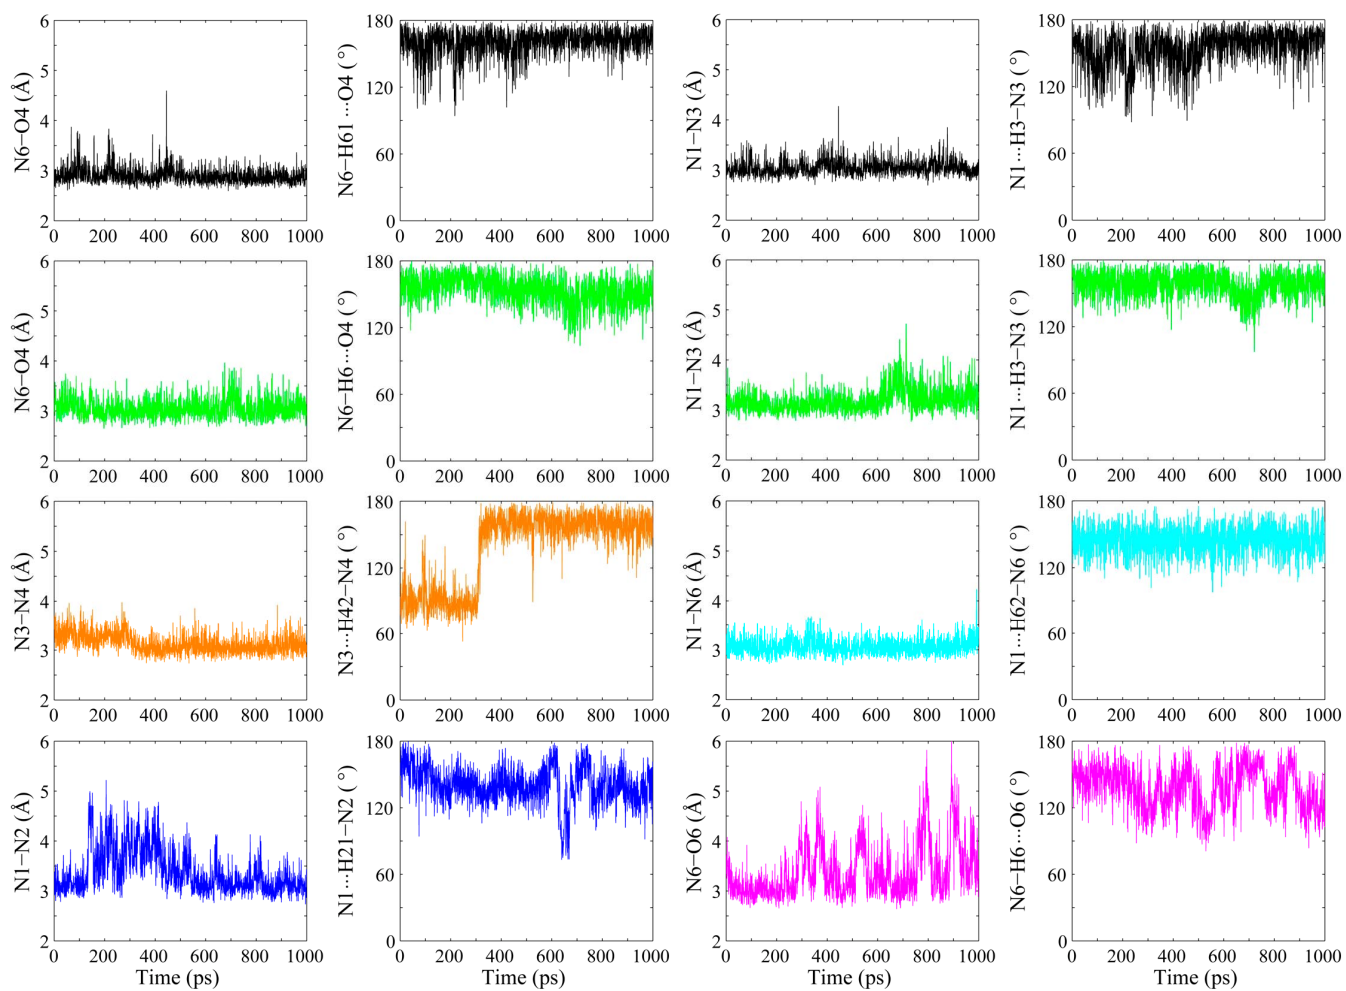

**Figure S5**

**(A) Control**

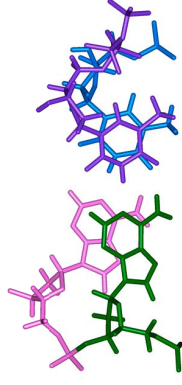

**(B) dTTP**

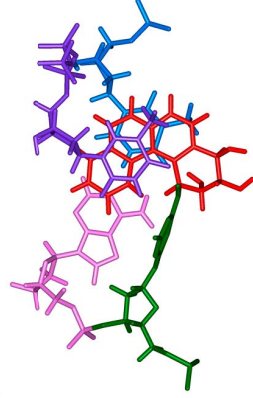

**(D) dATP**

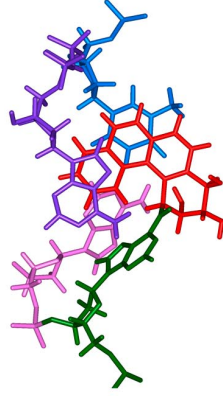

**(D) dCTP**

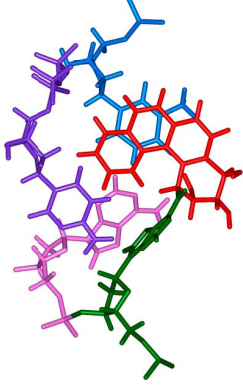

**(E) *syn*-dATP**

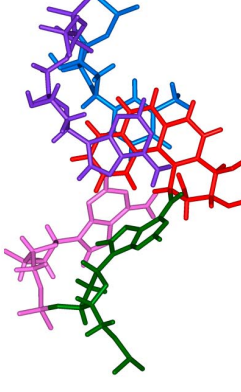

**(G) *syn*-dGTP**

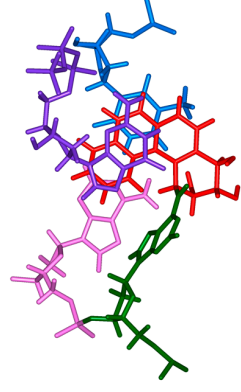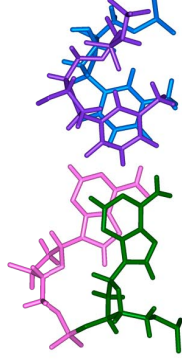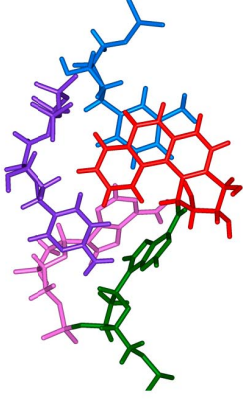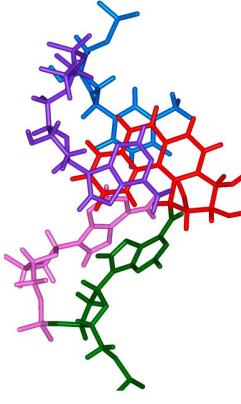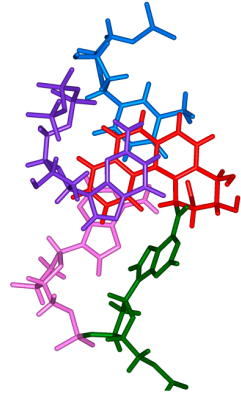

Figure S6

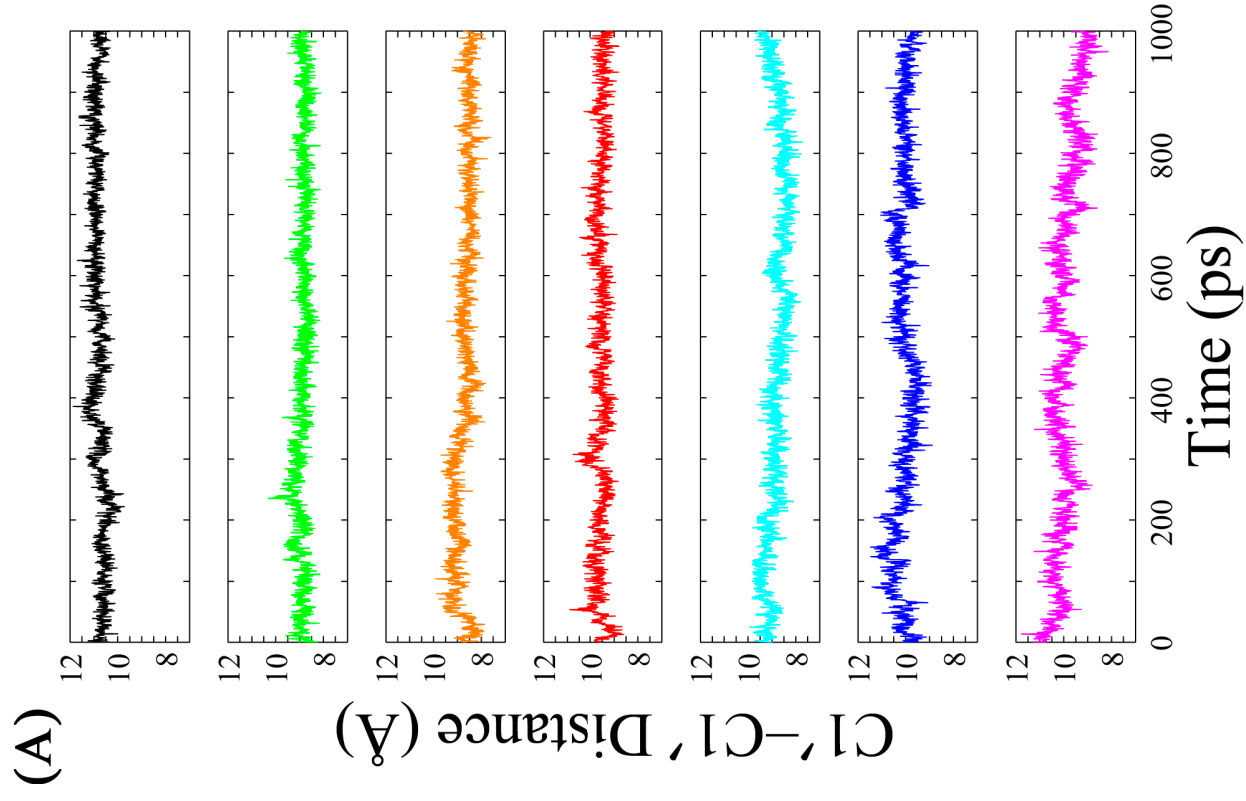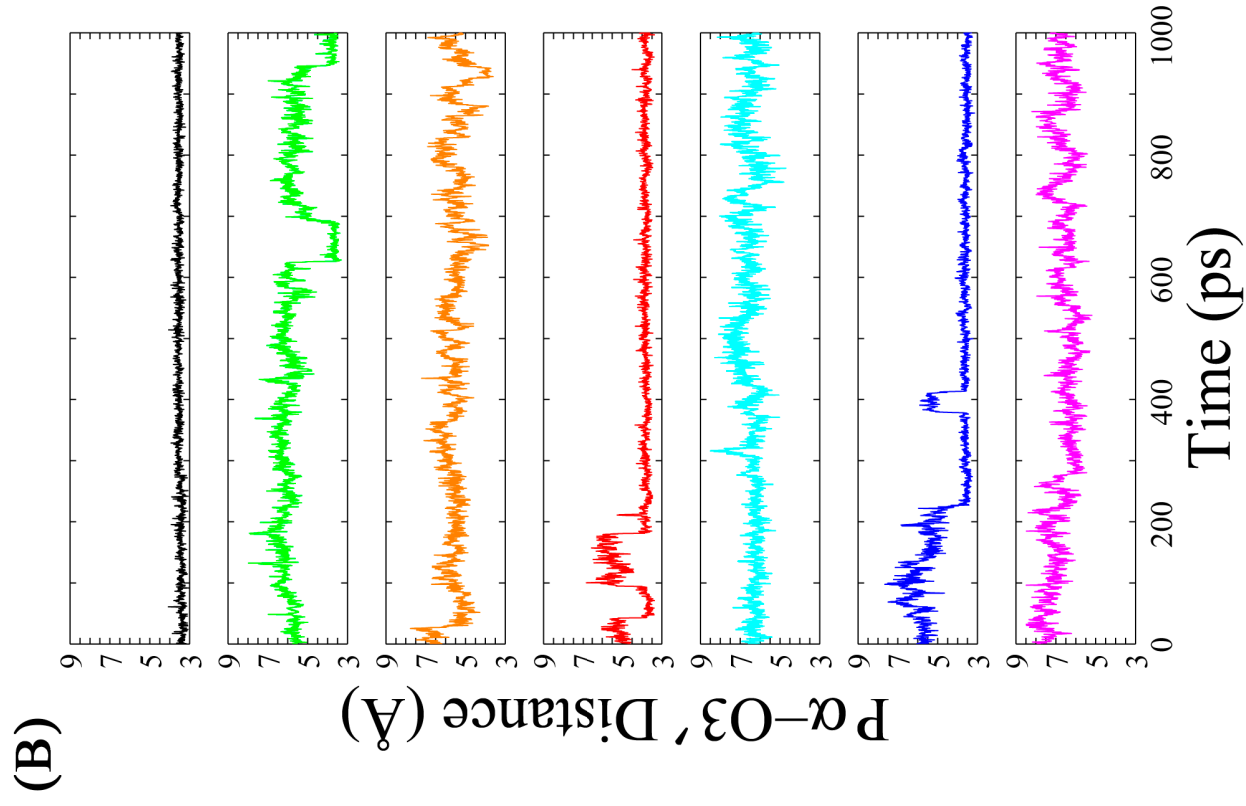

Figure S7

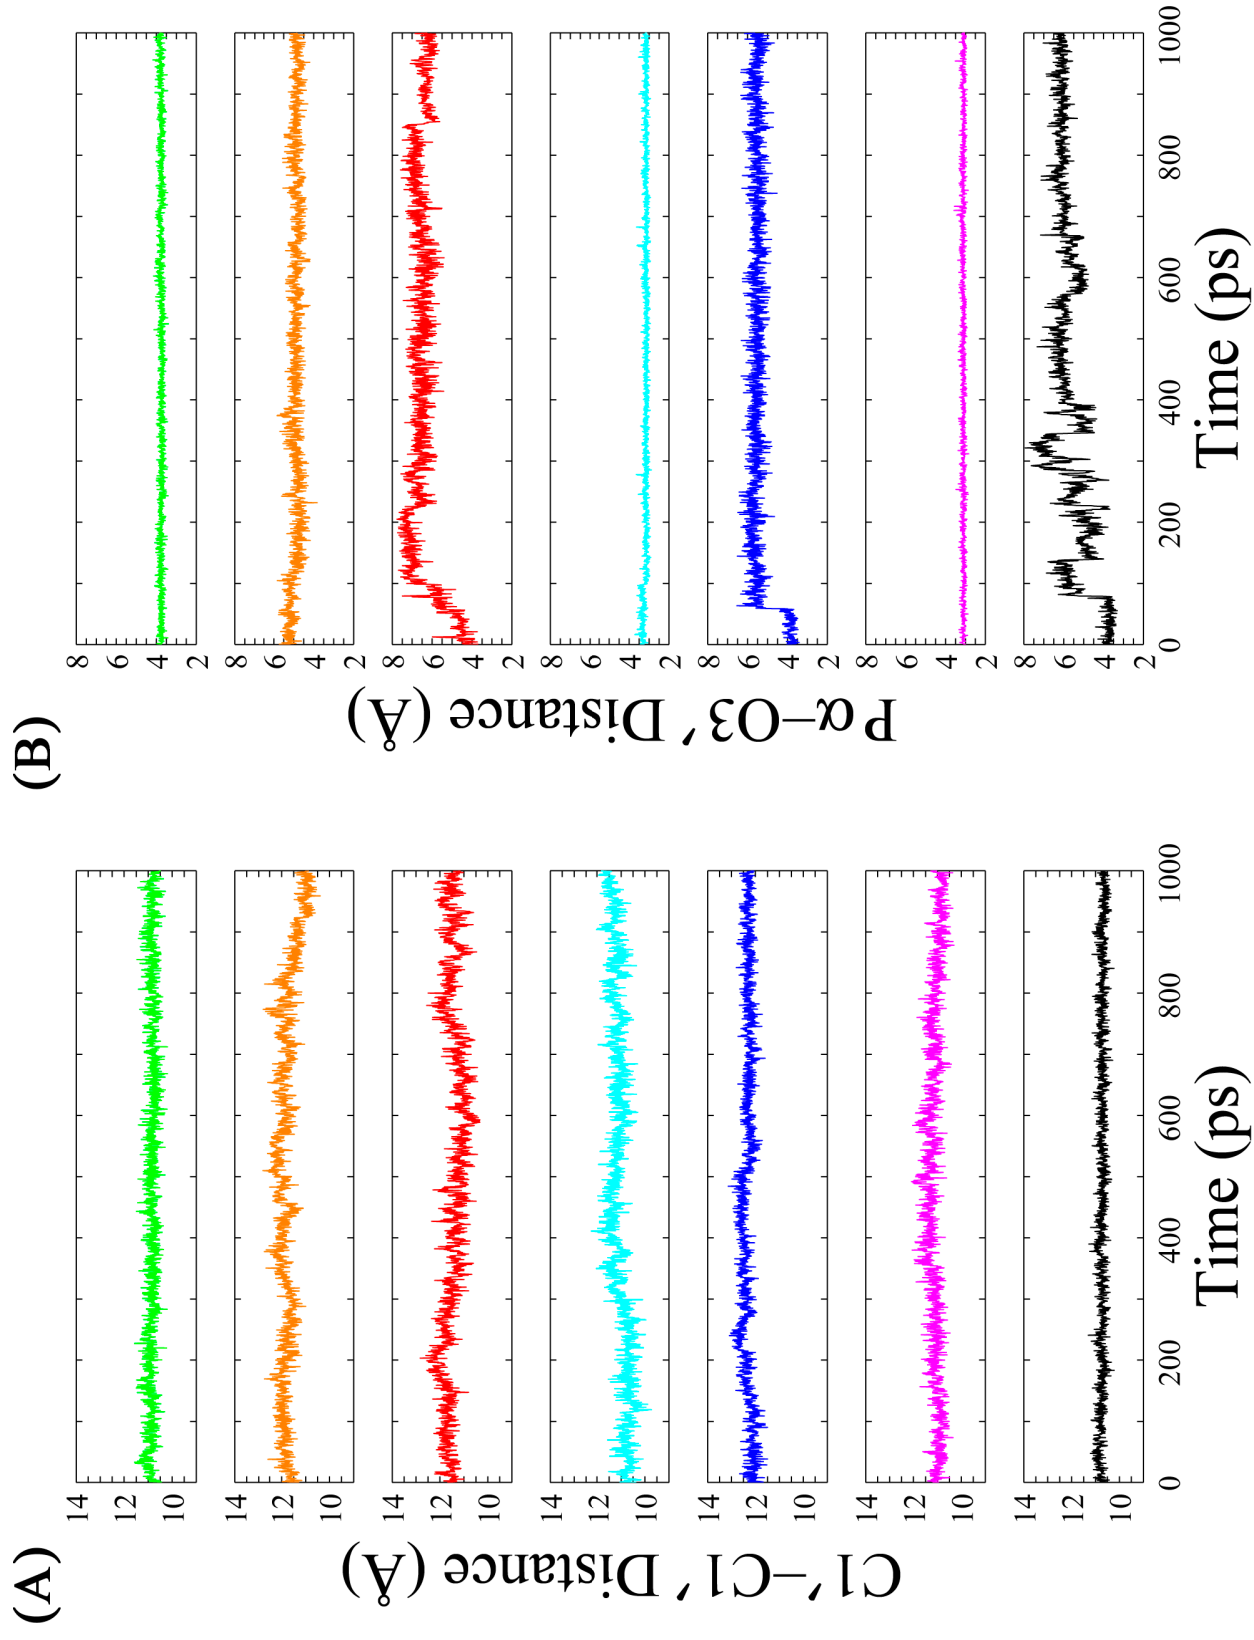

Figure S8

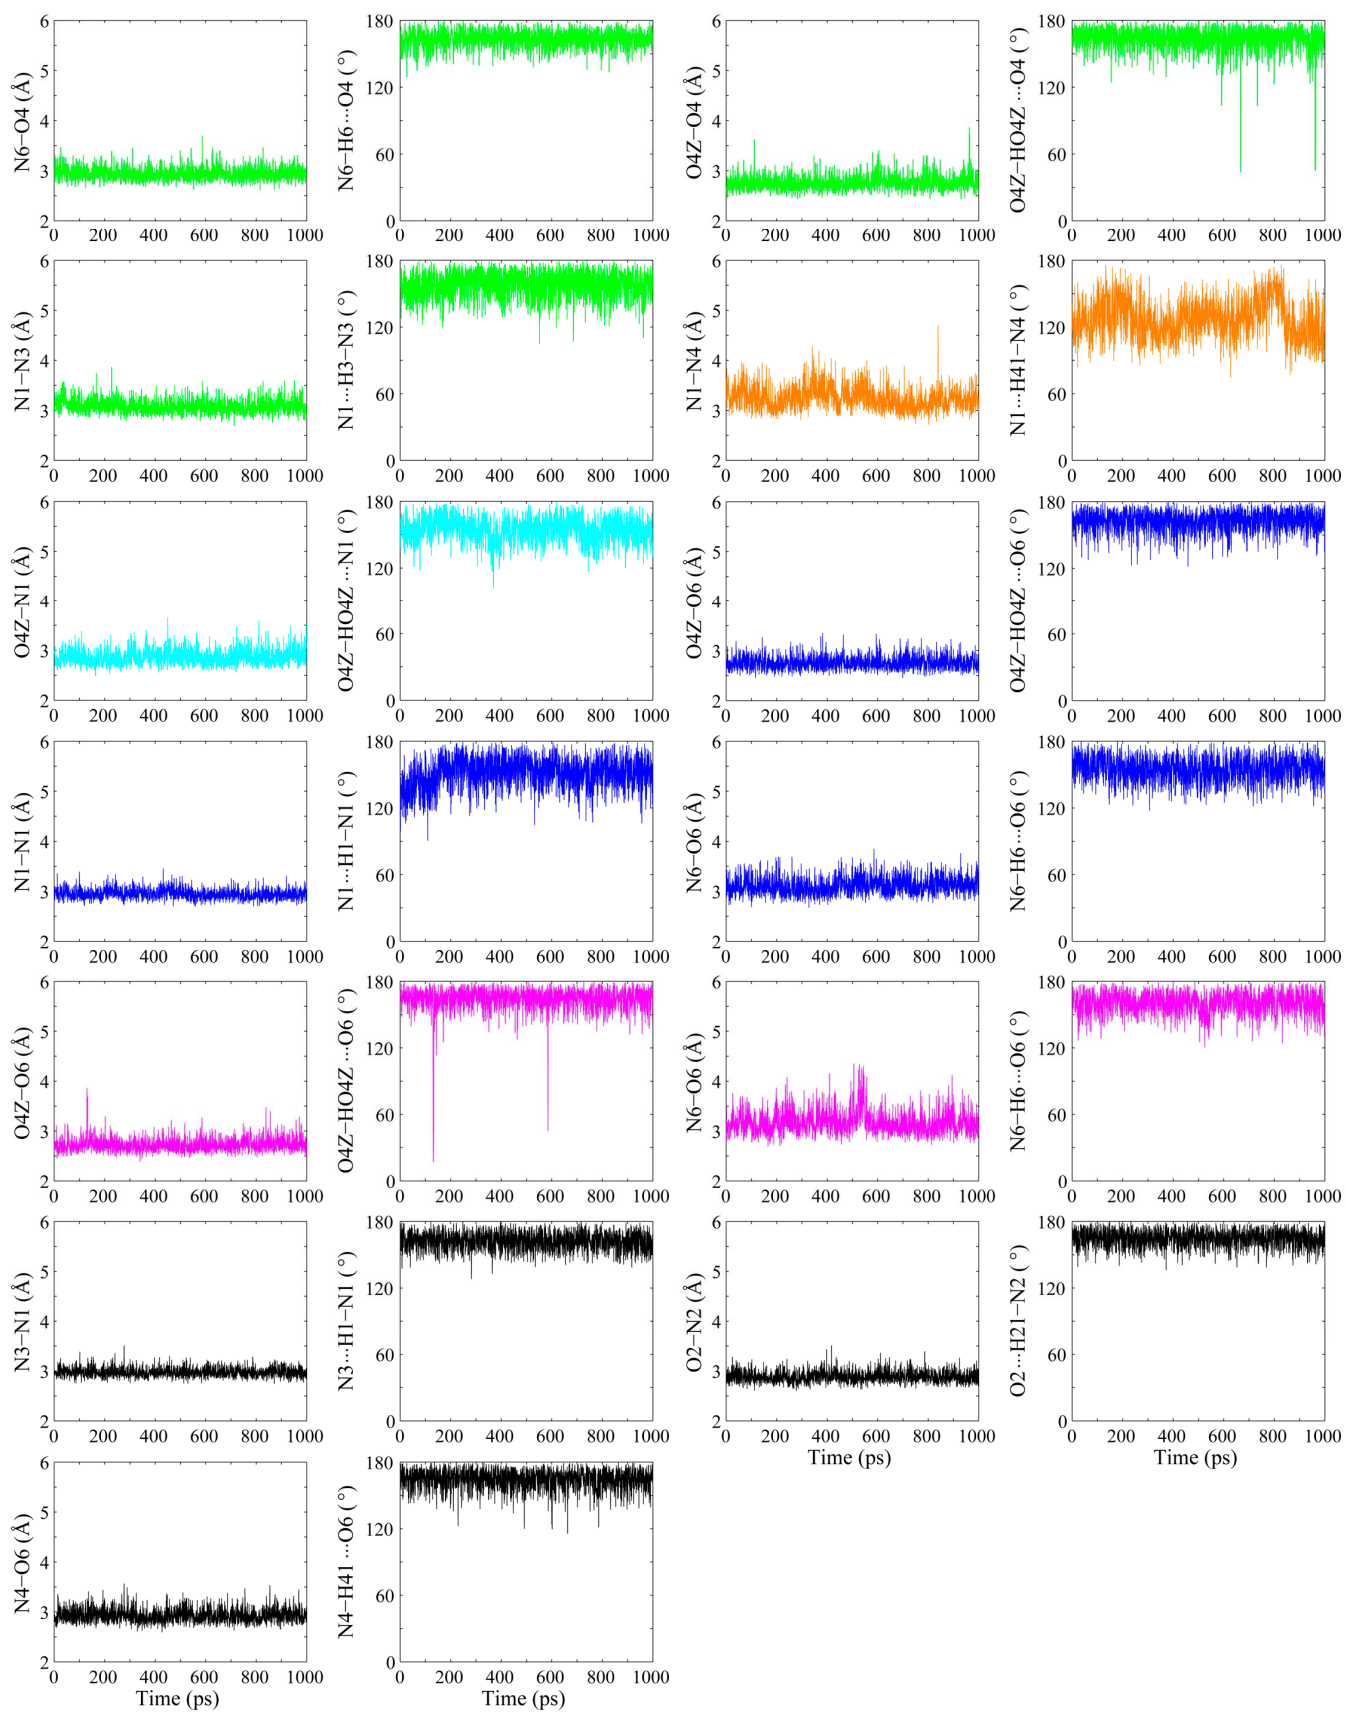



**Figure S9**

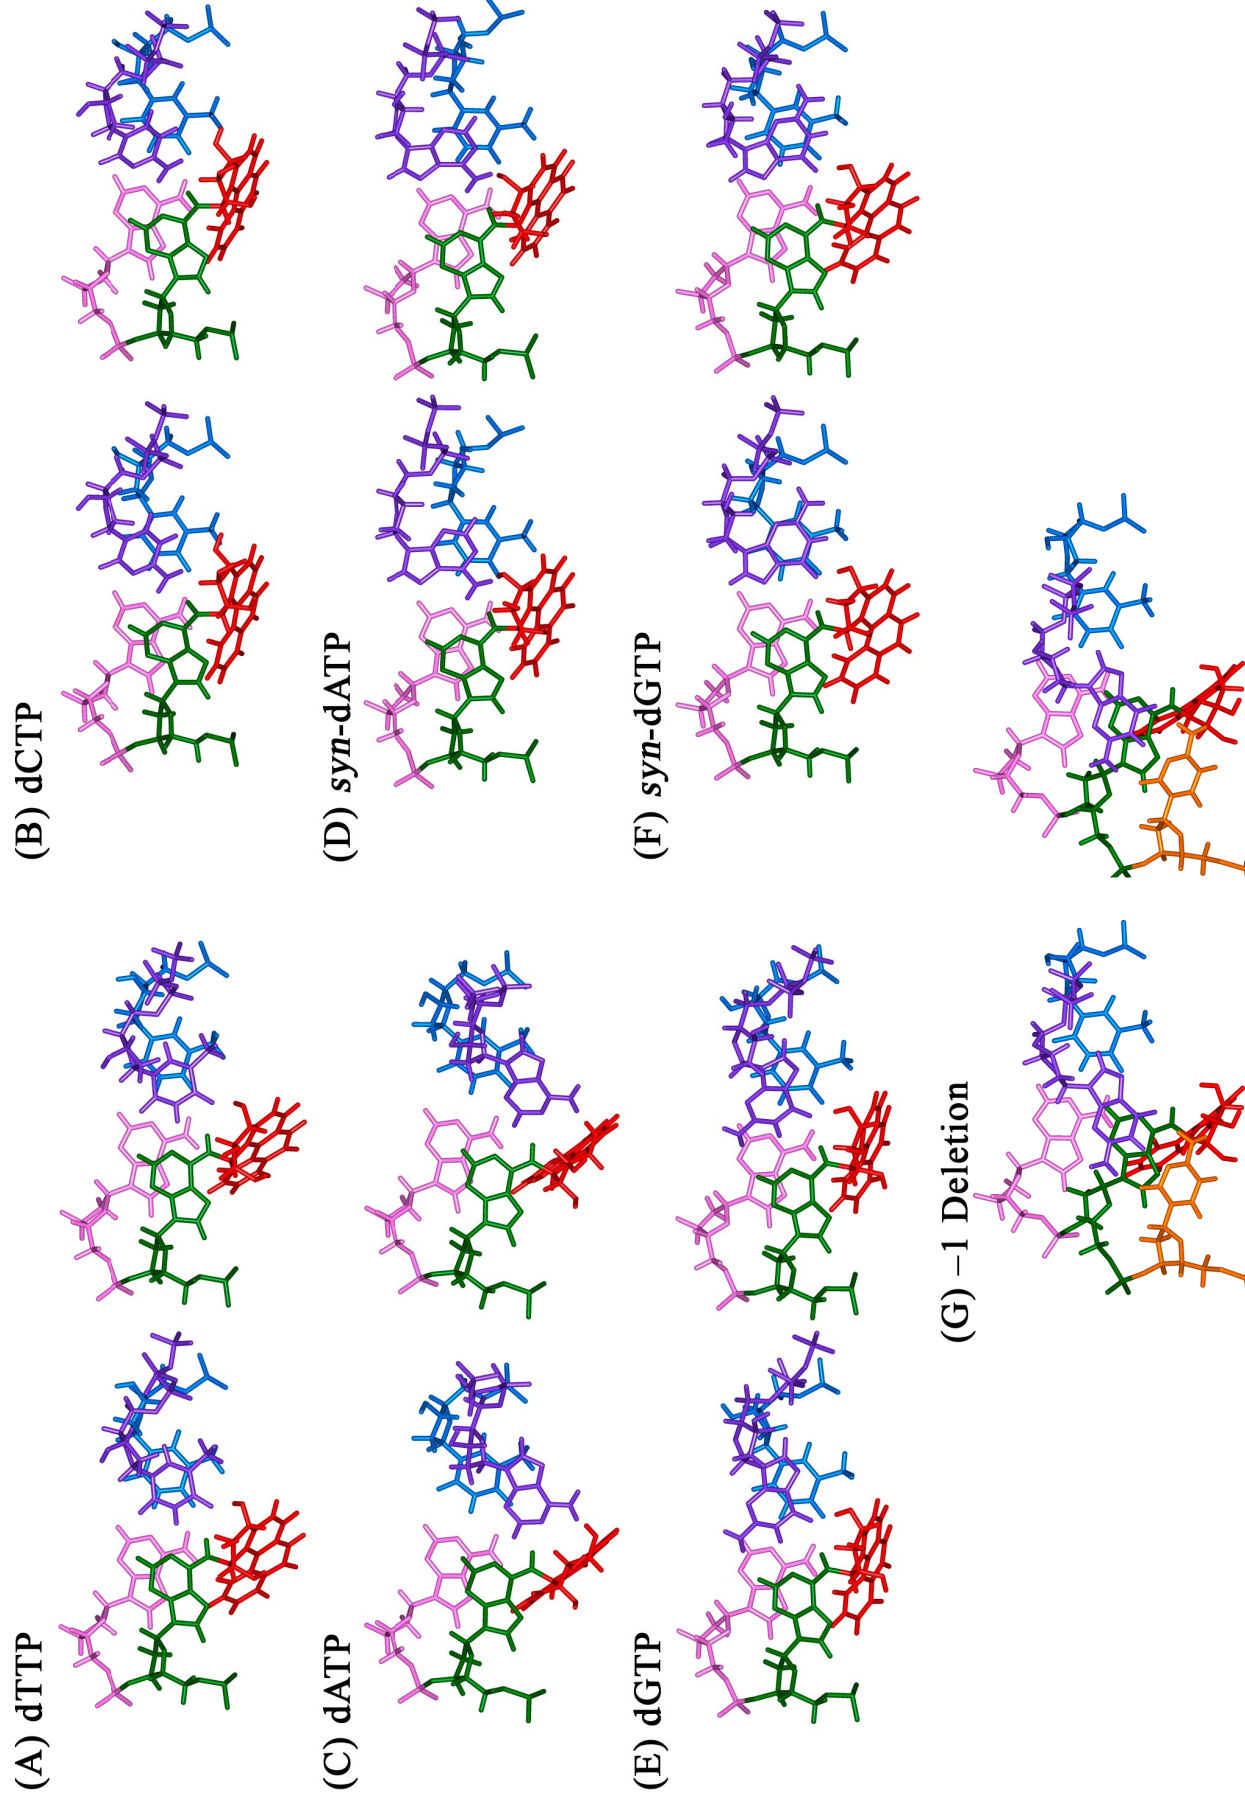

Supplement: NIHMS745347-supplement-Supporting_Information.pdf [file NIHMS745347-supplement-Supporting_Information.pdf]
